# Supplementary material for: Generation of Gellan Gum-Based Adipose-Like Microtissues
Source: MDPI journal article supplement (doi:10.3390/bioengineering5030052), 2018-06-27
Supplement: s1 [file s1]

Supplementary Material

# Generation of Gellan Gum-Based Adipose-Like Microtissues

**Manuela E. L. Lago** <sup>1,2,3</sup>, **Lucília P. da Silva** <sup>1,2</sup>, **Catarina Henriques** <sup>1,2</sup>, **Andreia F. Carvalho** <sup>1,2</sup>, **Rui L. Reis** <sup>1,2,3</sup> and **Alexandra P. Marques** <sup>1,2,3,\*</sup>

- <sup>1</sup> 3B's Research Group—Biomaterials, Biodegradables and Biomimetics, Headquarters of the European Institute of Excellence on Tissue Engineering and Regenerative Medicine, University of Minho, Avepark, Barco, 4805-017 Guimarães, Portugal; manuela.lago@i3bs.uminho.pt (M.E.L.L.); lucilia.silva@i3bs.uminho.pt (L.P.d.S.); catarinamhenriques@ua.pt (C.H.); andreiacarvalho@med.uminho.pt (A.F.C.); rgreis@i3bs.uminho.pt (R.L.R.);
- <sup>2</sup> ICVS/3B's—PT Government Associate Laboratory, Braga/Guimarães, Portugal
- <sup>3</sup> The Discoveries Centre for Regenerative and Precision Medicine, Headquarters at University of Minho, Guimarães, Portugal
- \* Correspondence: apmarques@i3bs.uminho.pt

**Table S1.** Phenotypic characterization of human adipose-derived stem cells prior differentiation through flow cytometry.

|              | Markers (%) |       |       |
|--------------|-------------|-------|-------|
|              | CD105       | CD90  | CD73  |
| Population 1 | 99,62       | 99,00 | 99,82 |
| Population 2 | 99,91       | 99,97 | 99,91 |
| Population 3 | 99,94       | 99,98 | 99,86 |

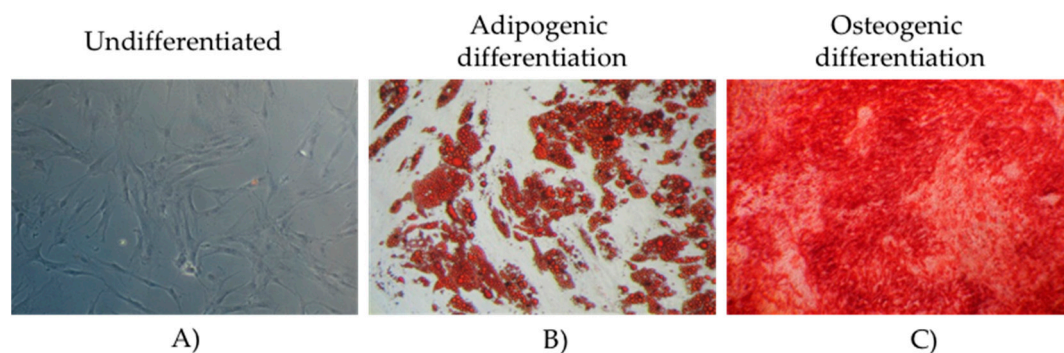

**Figure S1.** Capacity of human adipose-derived stem cells (hASCs) to differentiate in different lineages. Undifferentiated hASCs (A), and respective differentiation in an adipogenic lineage (B), as shown by the lipidic staining with Oil Red O, as well differentiation in an osteogenic lineage (C), as shown by the staining with alizarin red.
